# Supplementary material for: Staufen2 mediated RNA recognition and localization requires combinatorial action of multiple domains
Source: bioRxiv or medRxiv preprint supplement (doi:10.1101/396994), 2019-02-01
Supplement: Supplementary file [file 396994-1.pdf]

## Supplementary Information – Heber et al.

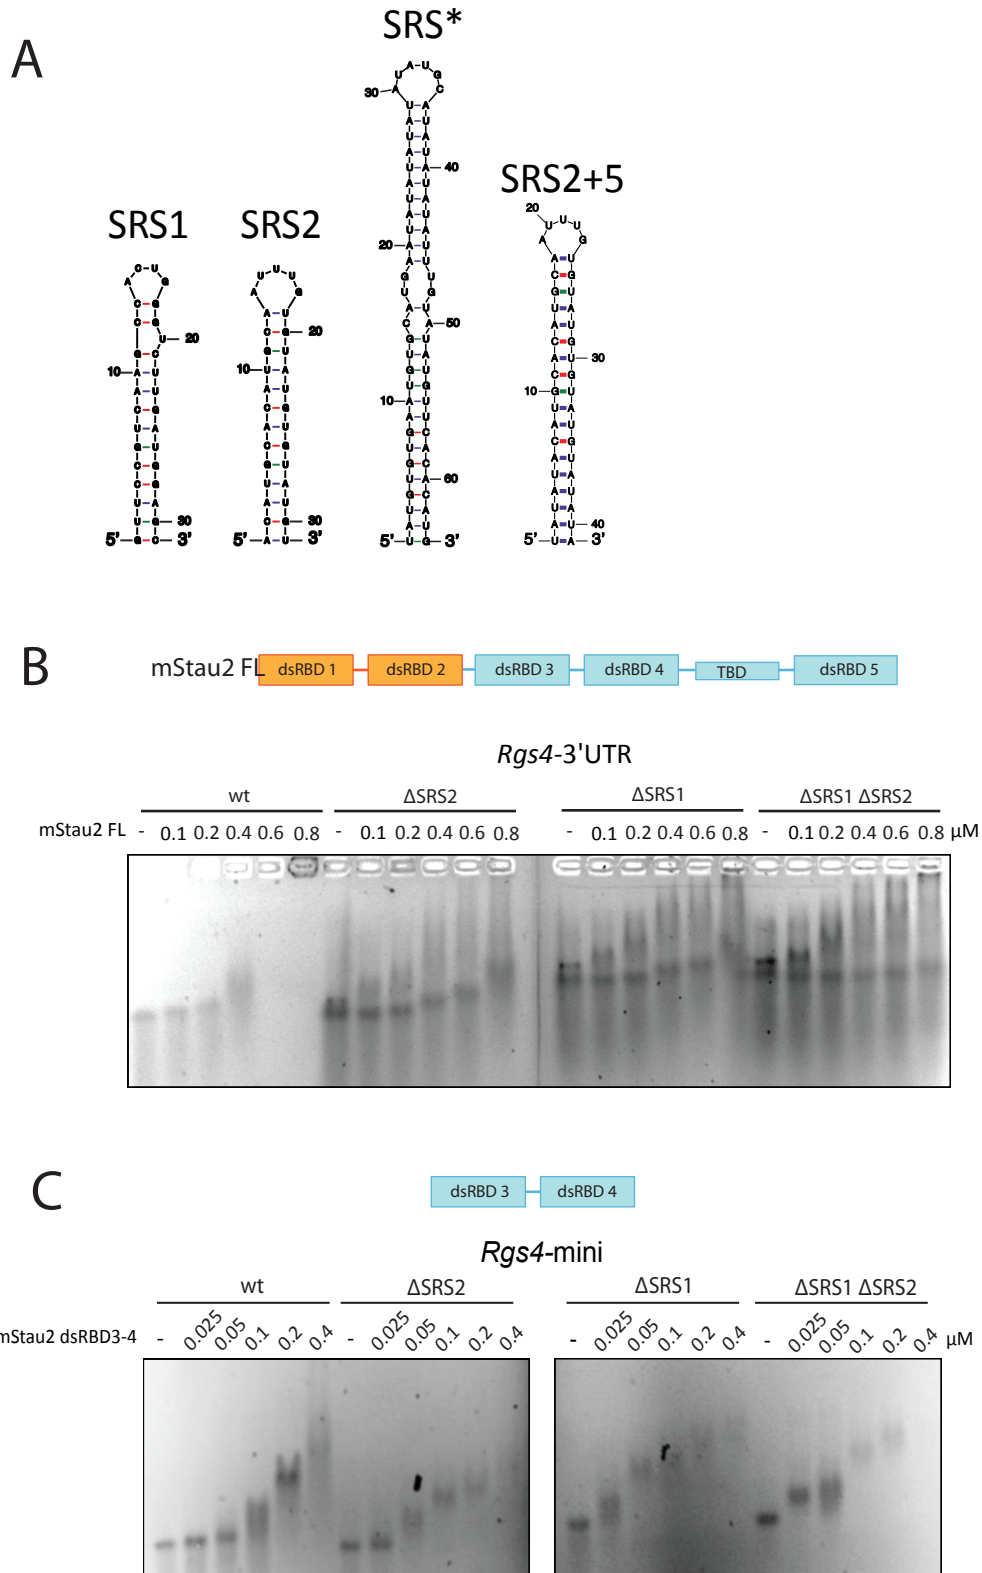

**Figure S1: EMSAs with mStau2 and *Rgs4* 3'UTR RNAs. A)** mStau2 full-length binds wild type *Rgs4* 3'UTR and SRS deletion mutants with similar apparent affinities in the nanomolar concentration range. **B)** mStau2 dsRBD3-4 binds *Rgs4*-mini wild type and SRS deletion mutants with similar apparent affinities in the nanomolar concentration range. Complexes were resolved in 1.5 % agarose gels and imaged via GelRed staining and UV imaging.

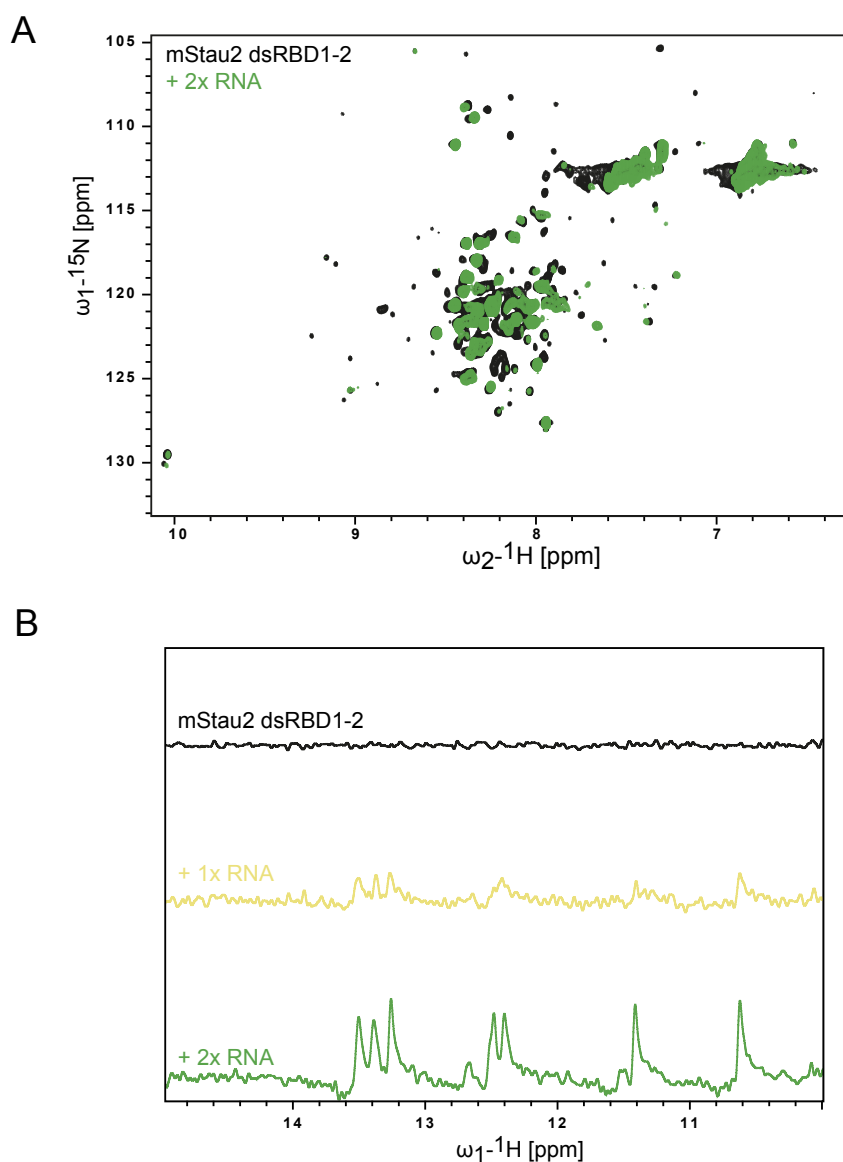

**Figure S2: NMR titration experiments of Stau2 dsRBD1-2 with SRS2 RNA. A)** Overlay of  $^1\text{H}$ ,  $^{15}\text{N}$ -HSQC spectra of dsRBD1-2 in absence and presence of 2x excess SRS2 RNA. Resonance shifts and line broadening of several signals are observed. **B)** Comparison of several 1D imino traces of SRS2 RNA at different stoichiometric ratios with dsRBD1-2.

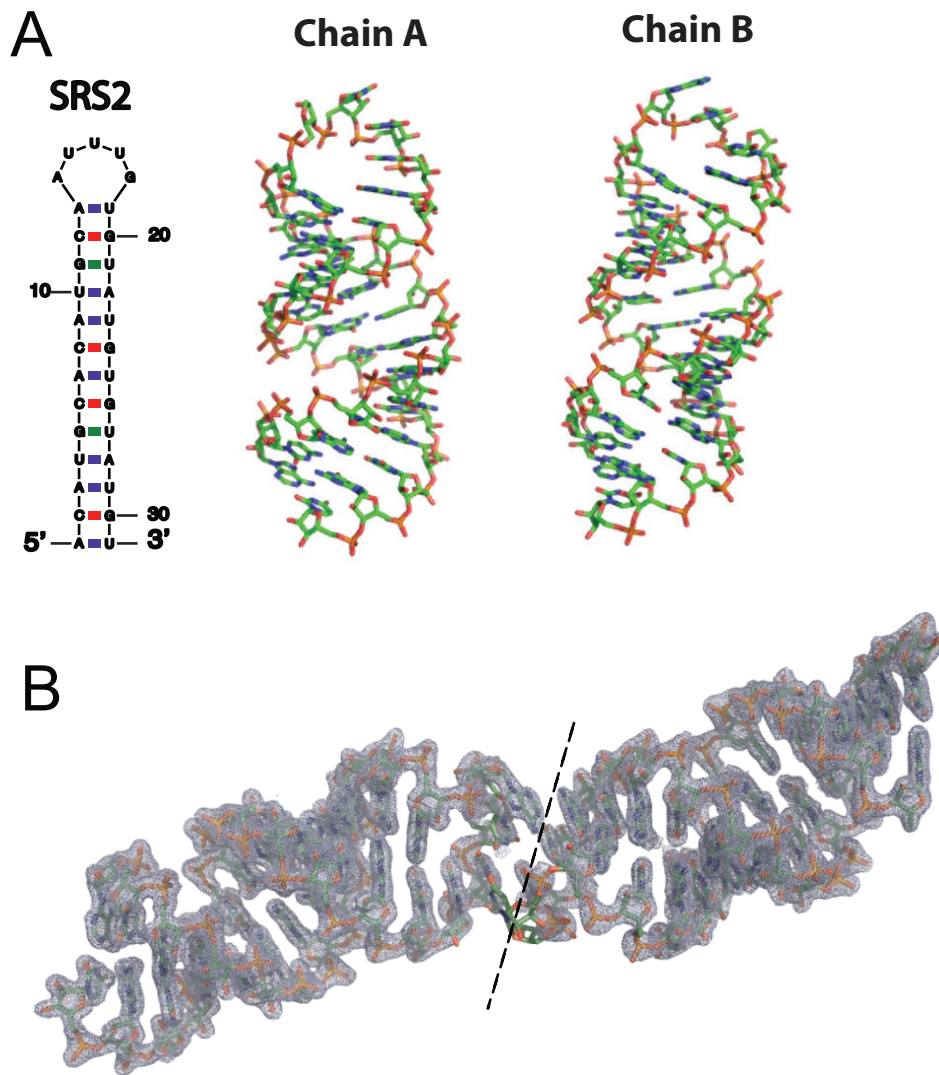

**Figure S3: Crystal structure of the isolated *Rgs4* SRS2 RNA stem-loop.** **A)** Schematic drawing of SRS2 RNA and the two molecules chain A and chain B contained in the asymmetric unit of the crystal lattice. Both molecules adopt the typical RNA A-form and form the expected stem-loop. Both chains differ slightly in their loop-regions, which appear to be disordered. **B)** Electron density map of the two RNA molecules in the asymmetric unit. Whereas the density map in the stem region of the RNA is very well defined, it is rather poor in the area of the two loops, indicating disordered loop regions.



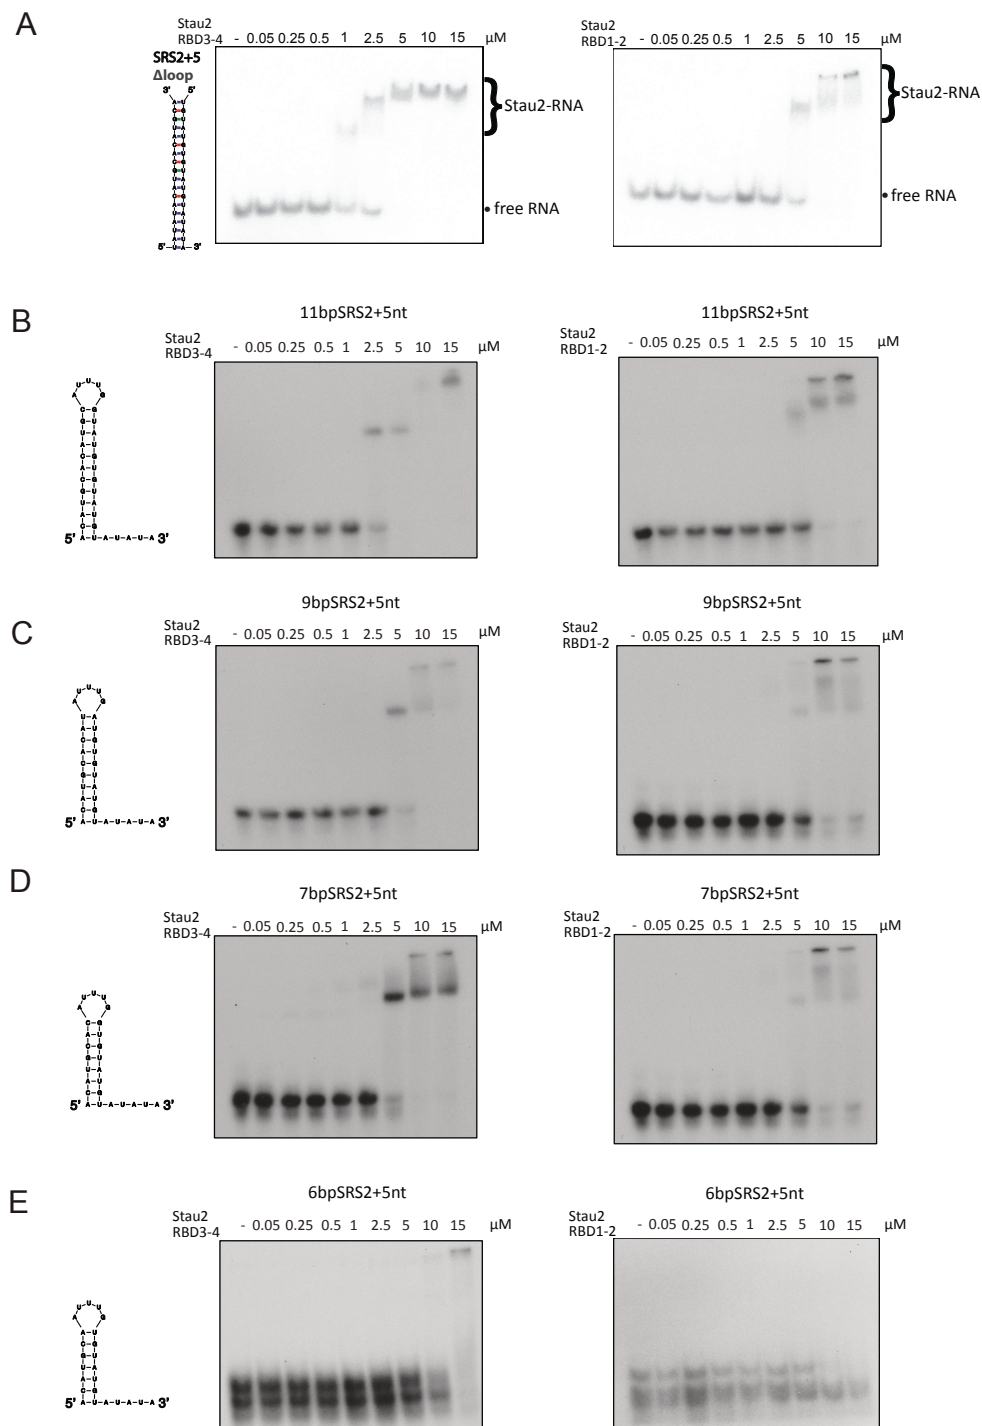

**Figure S5: EMSAs with mStau2 tandem domains dsRBD3-4 and dsRBD1-2 and modified SRS2 RNAs. A)** mStau2 binding to the elongated stem of SRS2 RNA without the loop region. Binding by both tandem domains to the elongated stem-loop is improved, the stem RNA is bound with similar affinity as SRS2, indicating that total length of the RNA determines binding rather than its specific structure. **B)** dsRNA stem-loops with 11bp, **C)** 9 bp and **D)** 7 bp are bound by both dsRBD3-4 (left) and dsRBD1-2 (right) with similar affinities in the micromolar concentration range. **E)** For a stem-loop with only 6 bp, binding is almost completely abolished. No protein-RNA complex is observed. To increase any effects of shortening the stem, SRS2 RNAs with a single-stranded 3' extension were used. This should improve affinity enough to allow for visualization of a deterioration of binding by mStau2 with shortening of the dsRNA stem. Complexes were resolved by native PAGE and imaged by PhosphorImaging or by exposure of radiograph films.

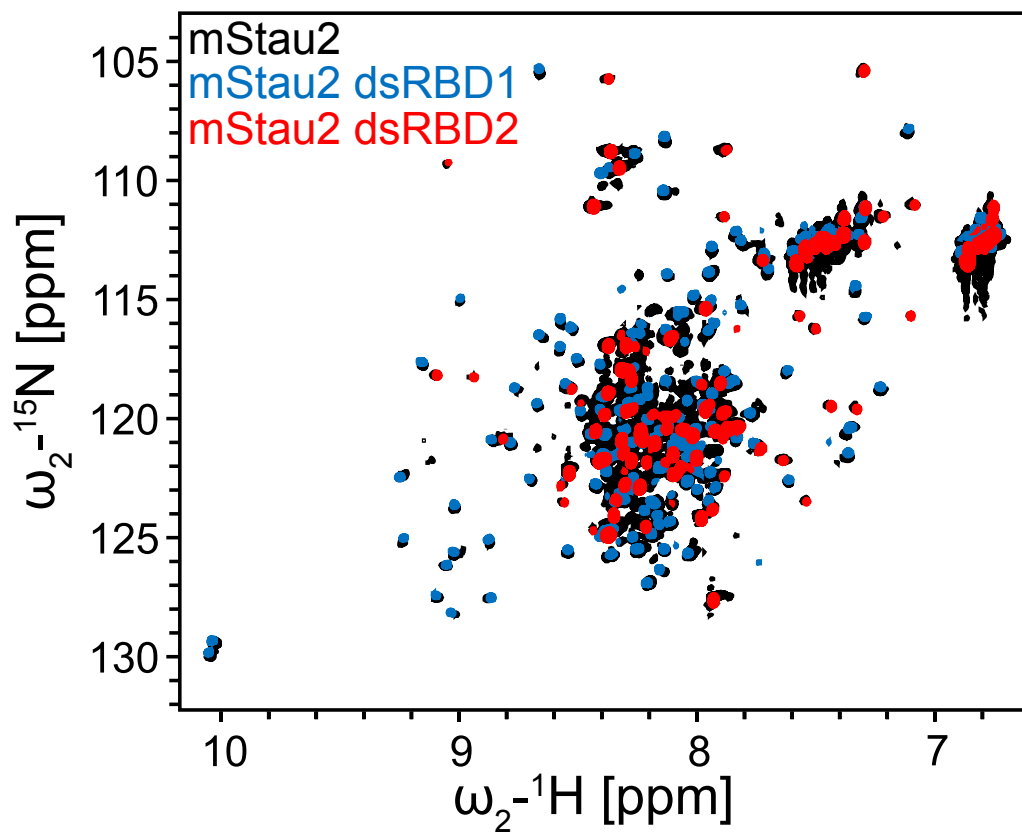

**Figure S6:** Overlay of the  $^1\text{H}$ ,  $^{15}\text{N}$ -HSQC spectra of the tandem domain dsRBD1-2 and the individual dsRBDs 1 and 2. The spectra of dsRBDs 1 and 2 overlap and add up to the spectrum of the tandem domain, indicating that dsRBDs 1 and 2 are separate, partially disordered domains.

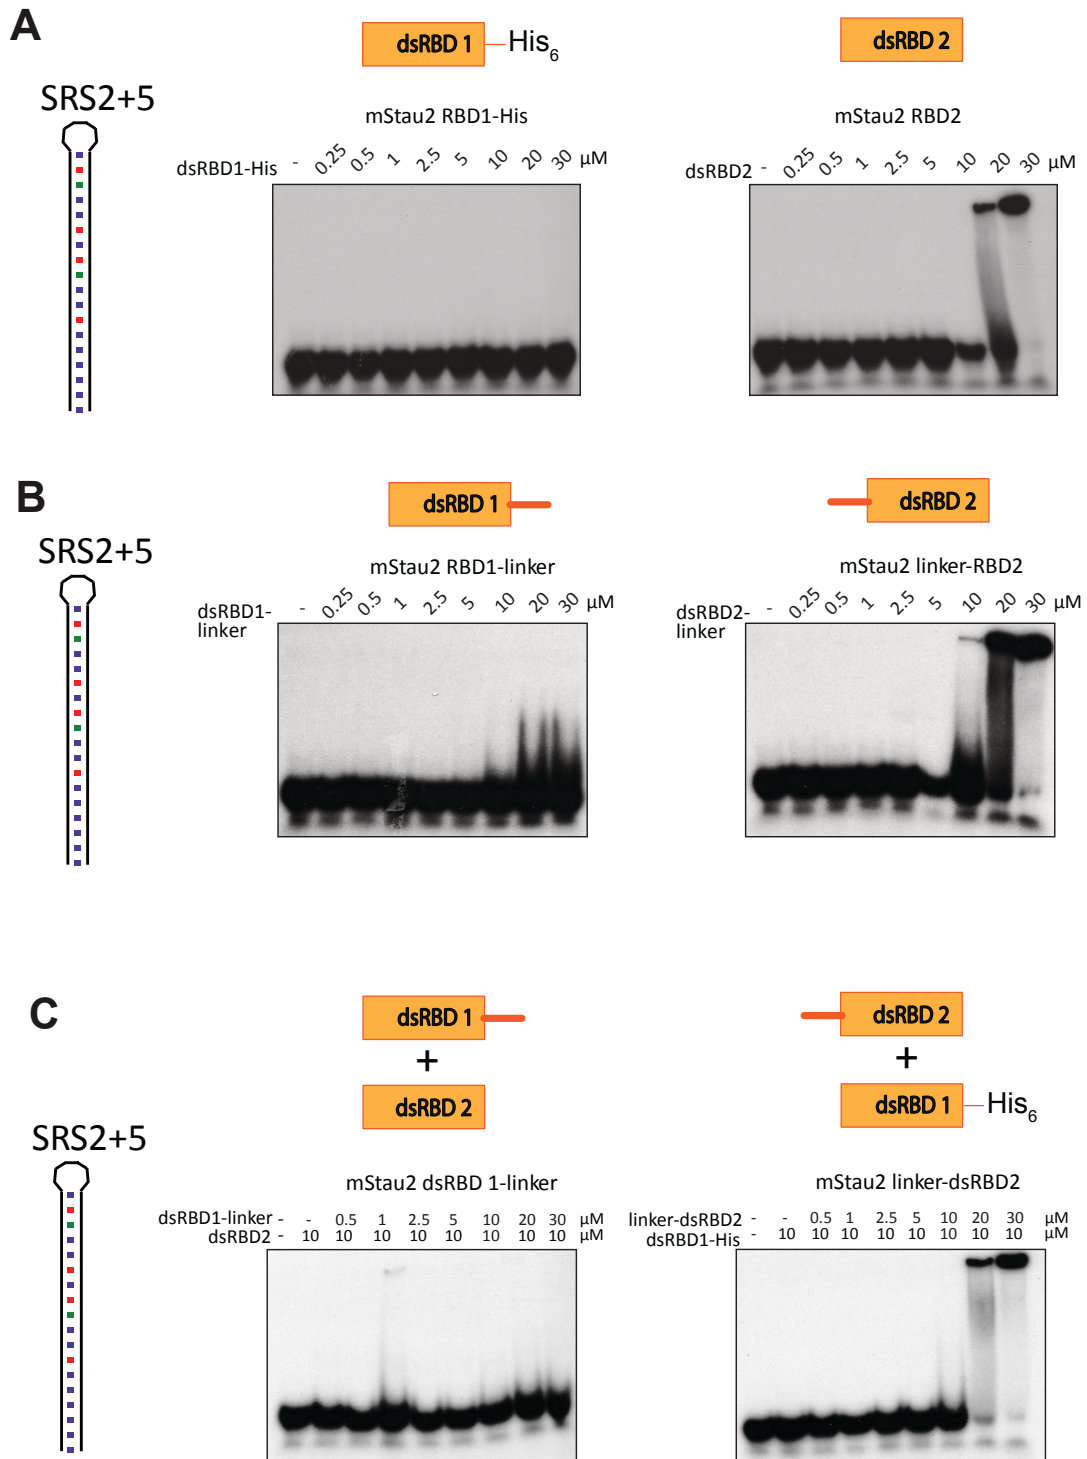

**Figure S7: EMSAs with the individual domains dsRBD1 and 2. A)** dsSRS2+5 RNA binding of dsRBD1-containing (left) and dsRBD2-containing (right) fragments . **B)** Binding of dsRBD1-linker (left) and linker-dsRBD2 (right) to dsSRS2+5 RNA. **C)** Binding of dsRBD1-linker (left) and linker-dsRBD2 (right) to dsSRS2+5 RNA in presence of the respective other domain at 10 μM.

## A Design of mutations in dsRBD1

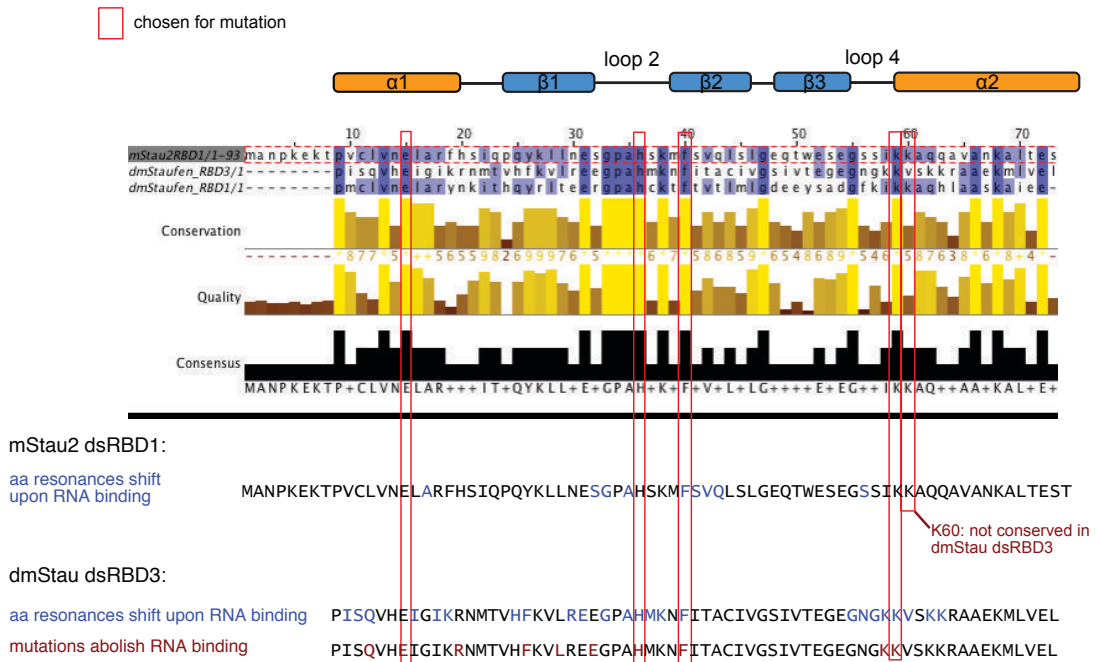

## B Design of mutations in dsRBD2

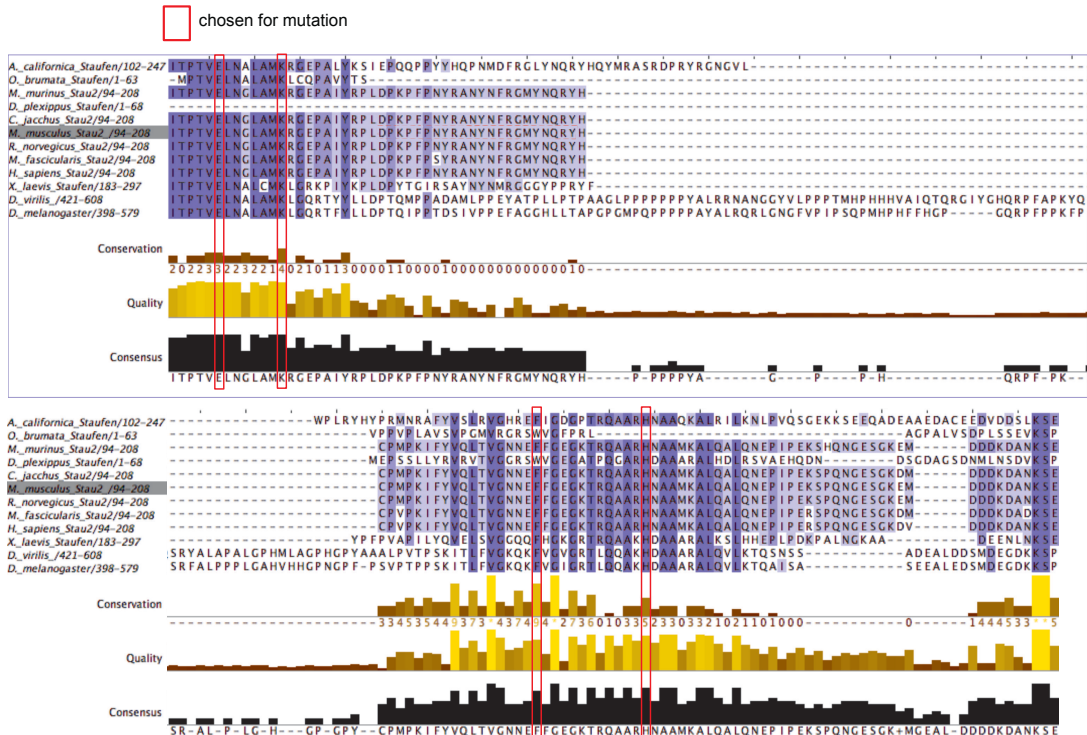

**Figure S8: Sequence analysis used for mutant design of dsRBD1 and dsRBD2. A)** Multiple sequence alignment of mStau2 dsRBD1, dmStau dsRBD1, and dmStau dsRBD3. Below, assigned residues with NMR chemical shift perturbations upon RNA titration are marked in the sequence of mStau2 dsRBD1 in blue. Residues chosen for mutation are marked by red boxes. Designed mutations map to regions previously identified to be involved in RNA binding in dmStau dsRBD3 (Ramos et al., 2000). **B)** Multiple sequence alignment of mStau2 dsRBD2 to Stau proteins from 11 different species. Residues chosen for mutation are marked by red boxes. Plots were generated with the program JalView.



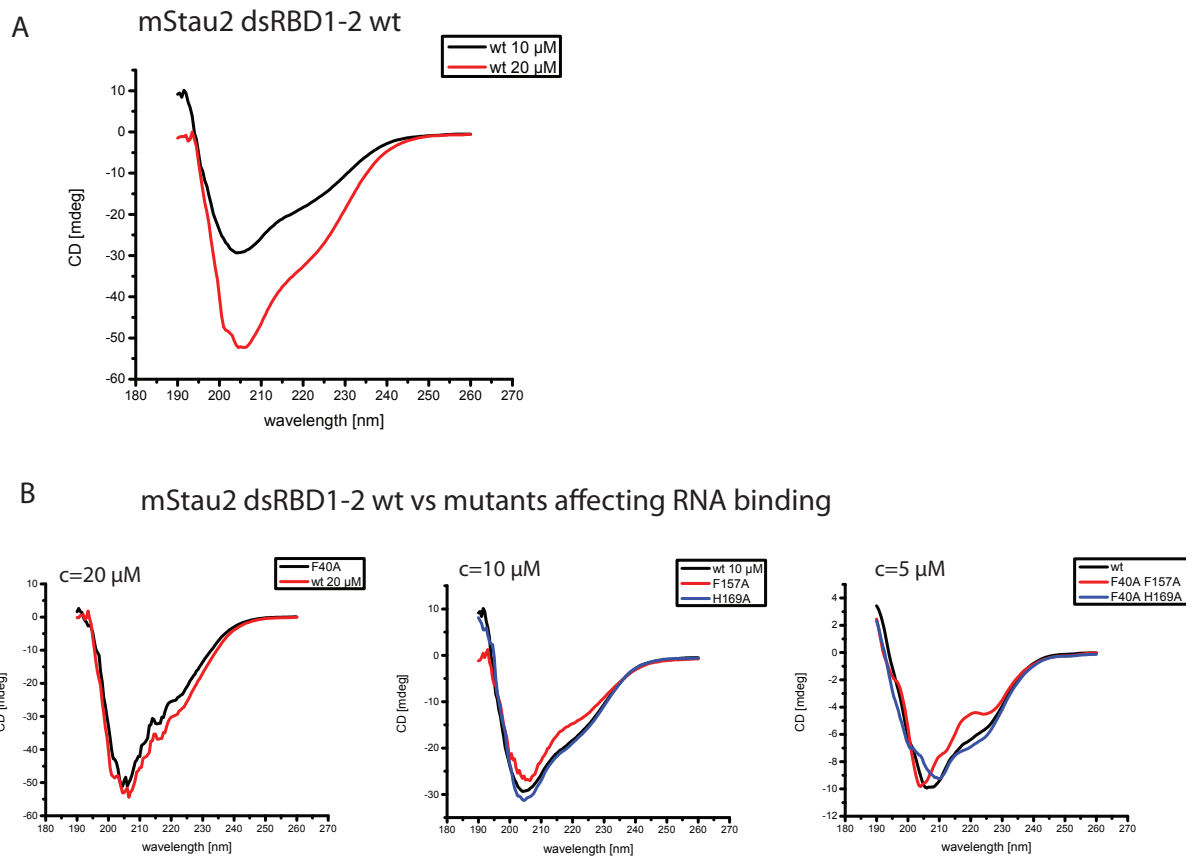

**Figure S9: Circular dichroism spectra of mStau2 dsRBD1-2 versions. A)** Wild type mStau2 dsRBD1-2 at different concentrations and **B)** RNA-binding mutants of dsRBD1-2 compared to wild type dsRBD1-2. Measurements were performed at the indicated concentrations in buffer containing <50 mM NaCl. All curves show very similar profiles, indicating that mutant proteins adopt the same fold as wild type dsRBD1-2.

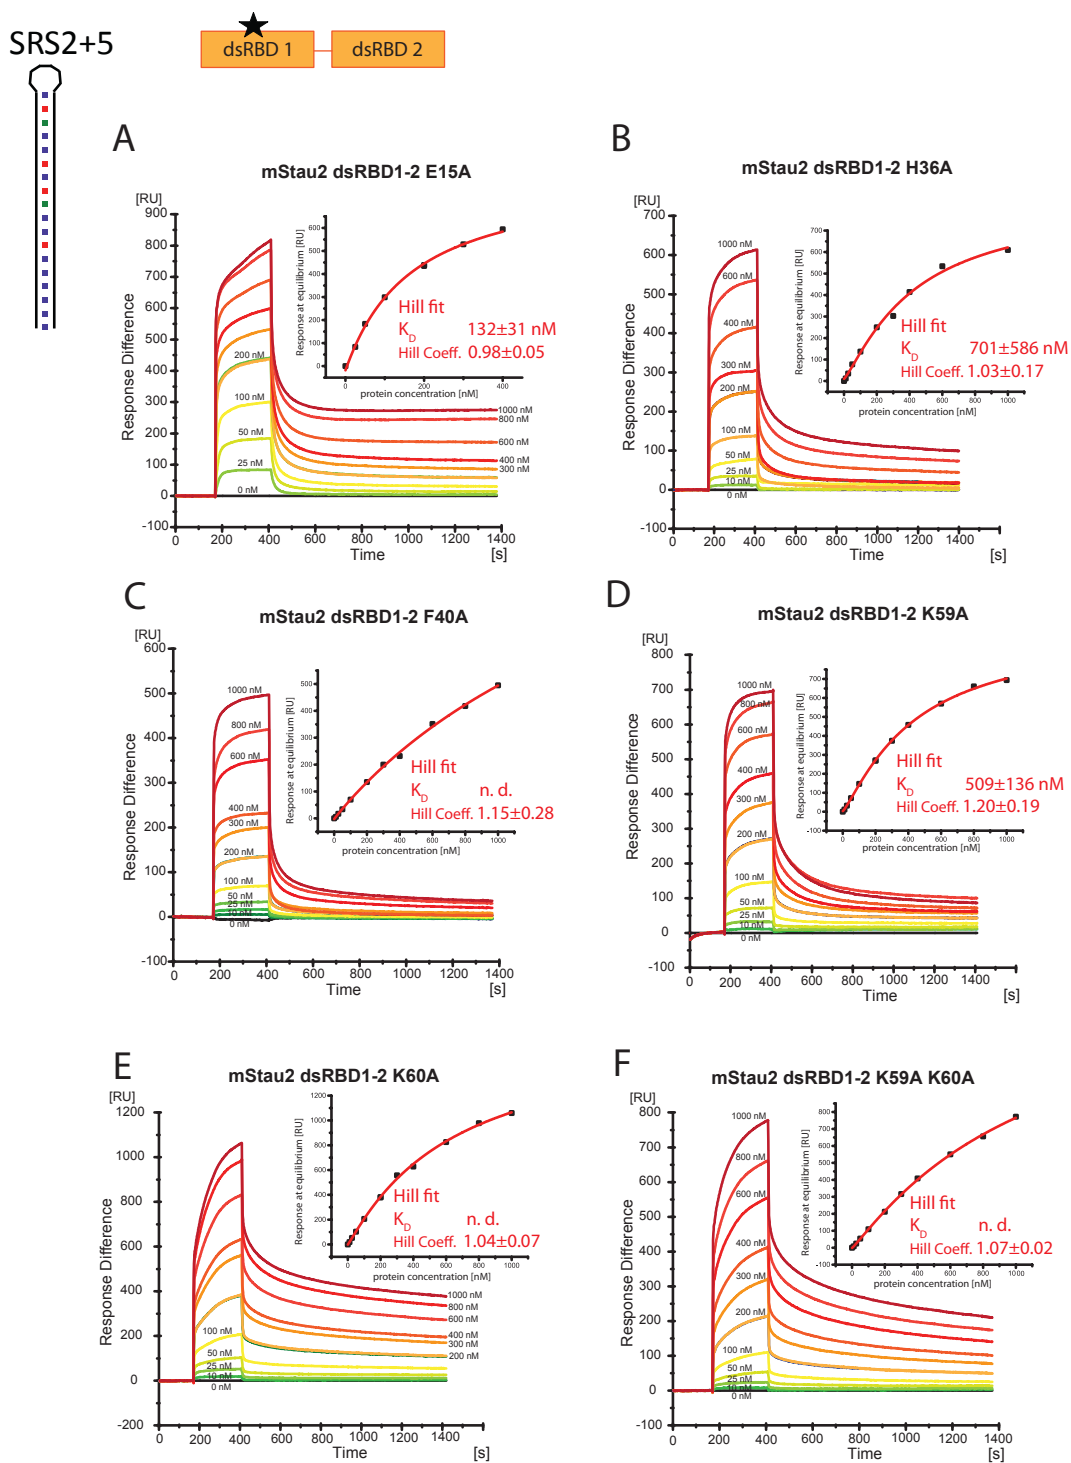

**Figure S10: SPR sensorgrams and curve fitting of SRS2+5 RNA binding by mStau2 dsRBD1-2 with mutations in dsRBD1. A-F)** Mutant versions of mStau2 dsRBD1-2. A) E15A, B) K59A, C) H36A, and E) F40A bind SRS2+5 transiently with fast kinetics. The steady-state binding curves are described by Hill-fits with Hill coefficients  $n \approx 1$ , indicating non-cooperative binding.

SRS\*

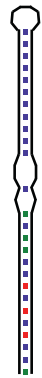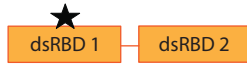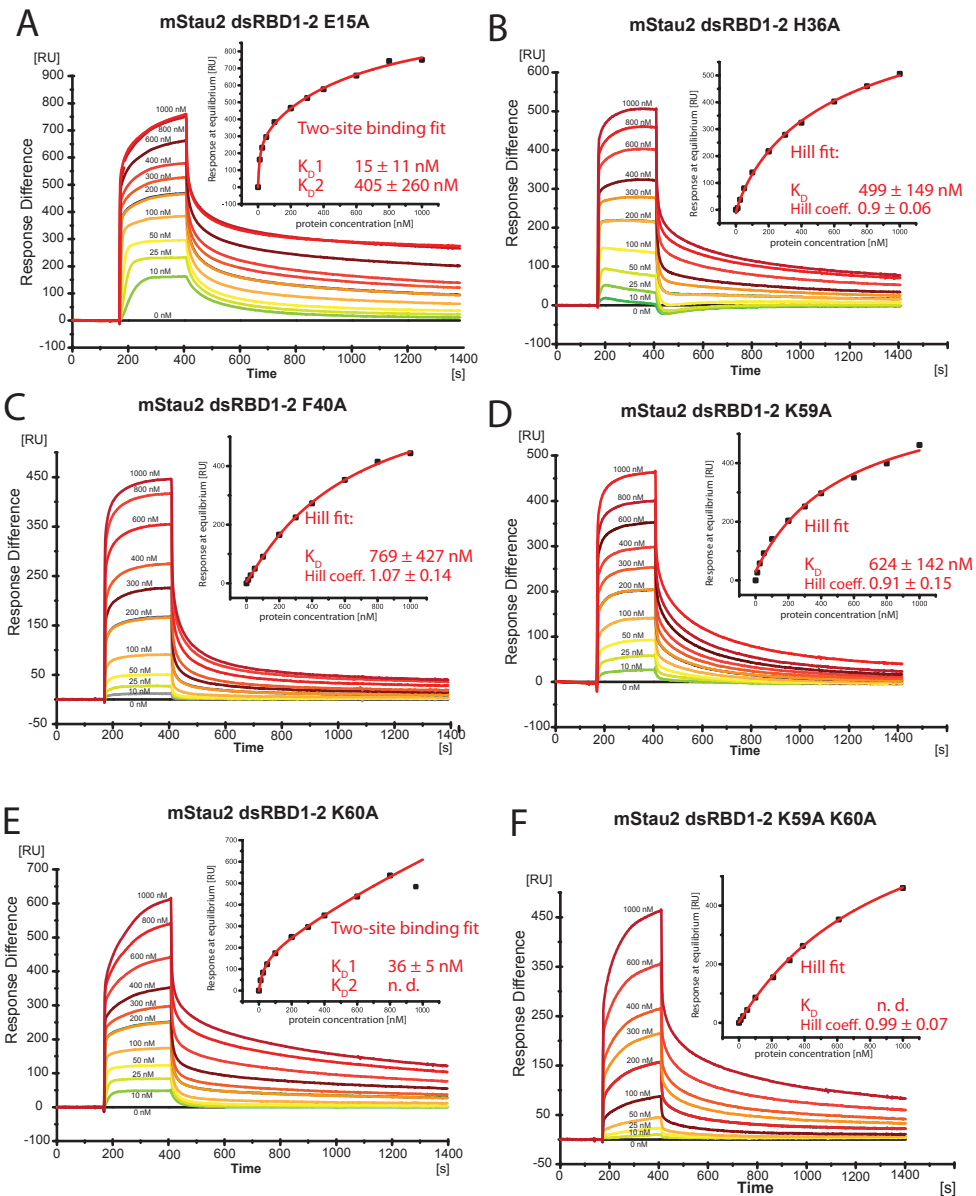

**Figure S11: SPR sensorgrams and curve fitting of SRS\* RNA binding by mStau2 dsRBD1-2 with mutations in dsRBD1. A-F) Mutant versions of mStau2 dsRBD1-2. B) K59A, C) H36A, E) F40A and F) K59A K60A bind SRS2+5 transiently with fast kinetics. The steady-state binding curves are described by Hill-fits with Hill coefficients  $n \approx 1$ , indicating non-cooperative binding. Mutants mStau2 dsRBD1-2 A) E15A and D) K60A bind similar to mStau2 dsRBD1-2 wild type.**

SRS2+5

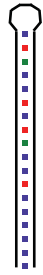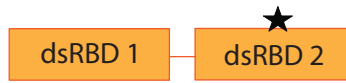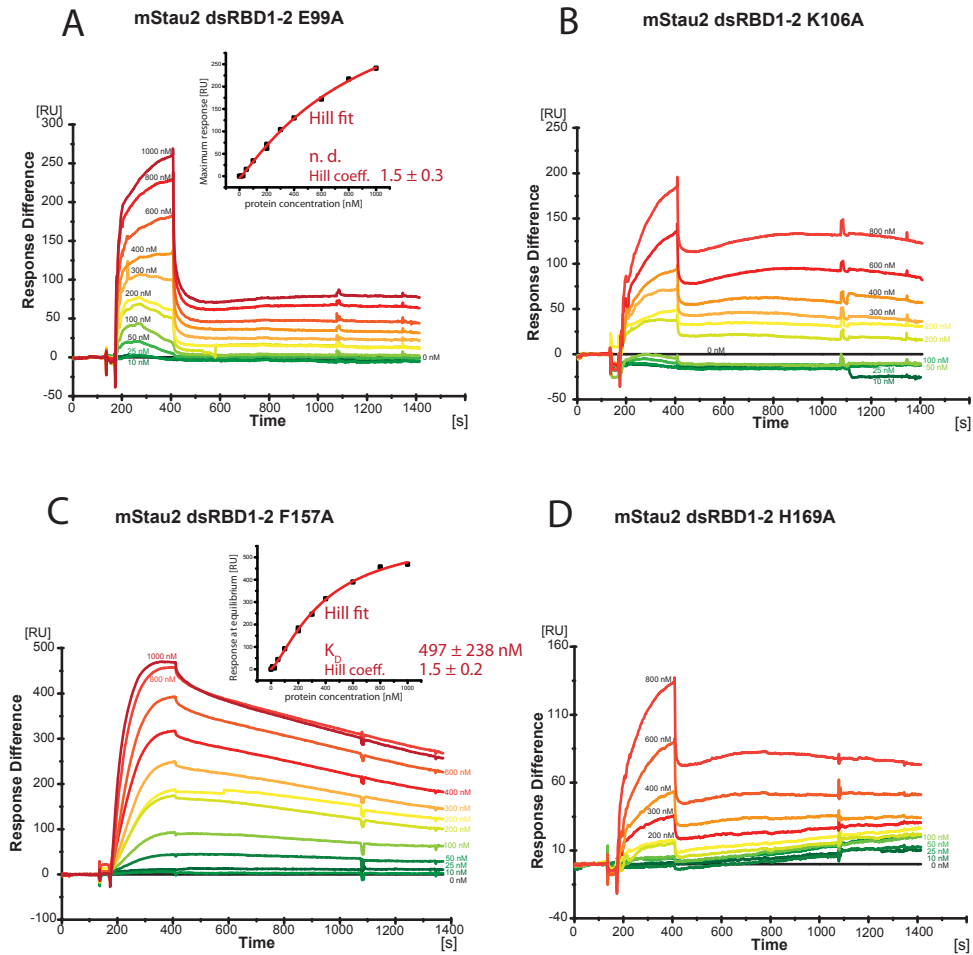

**Figure S12: SPR sensorgrams and curve fitting of SRS2+5 RNA binding by mStau2 dsRBD1-2 with mutations in dsRBD2.** mStau2 dsRBD1-2 **A**) E99A, **B**) K106A, **C**) F157A, **D**) H169A show decreased binding to SRS2+5 RNA when compared to wild-type protein. For RBD1-2 E99A (**A**) and F157A (**C**), steady-state binding curves are shown. For dsRBD1-2 K106A (**B**) and H169A (**D**), steady-state could not be reached.

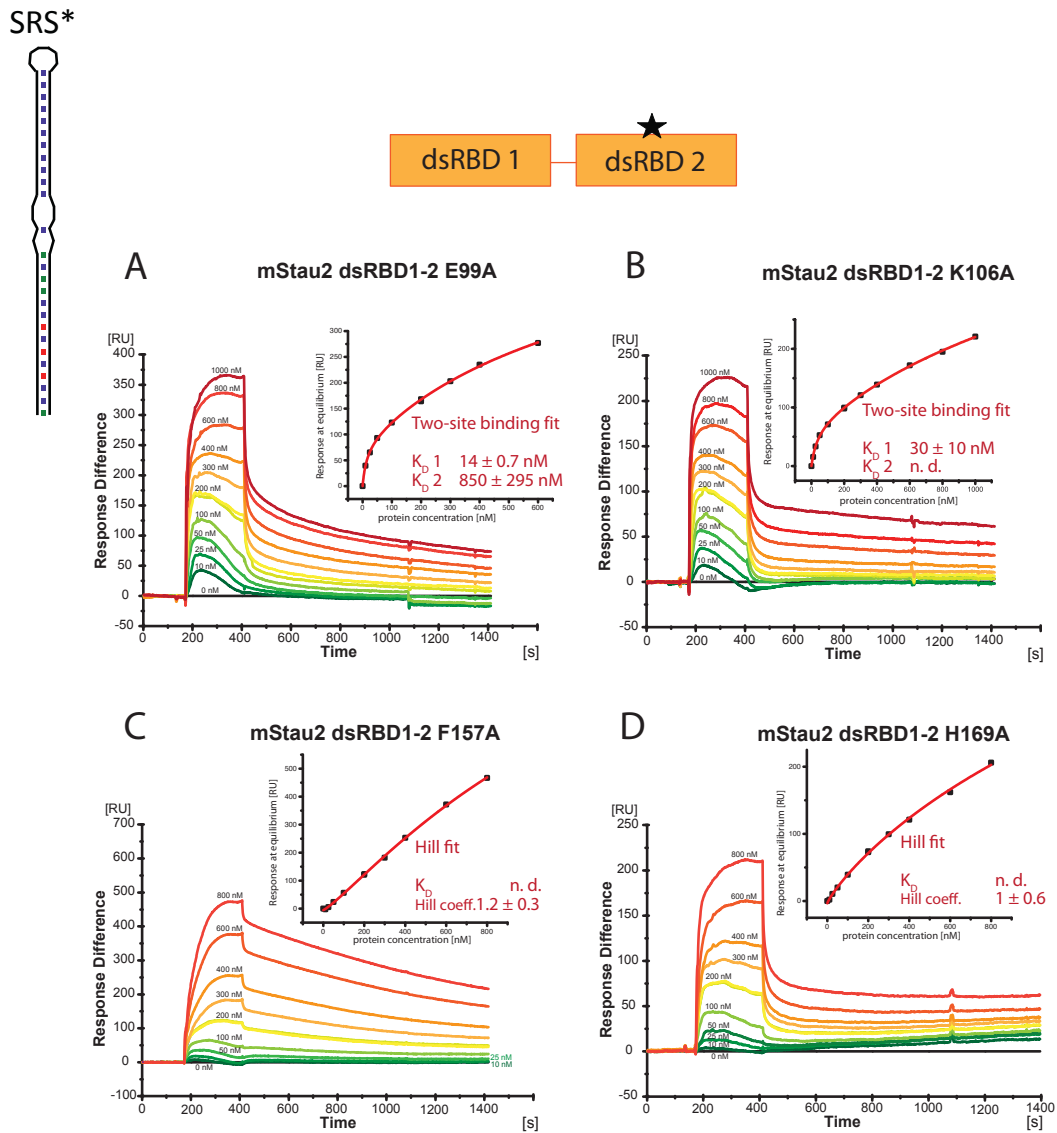

**Figure S13: SPR sensorgrams and curve fitting of SRS\* RNA binding by mStau2 dsRBD1-2 with mutations in dsRBD2. mStau2 dsRBD1-2 A) E99A, and B) K106A bind RNA similar to wild-type dsRBD1-2. In contrast, mStau2 dsRBD1-2 C) F157A and D) H169A show decreased binding to SRS\* RNA.**

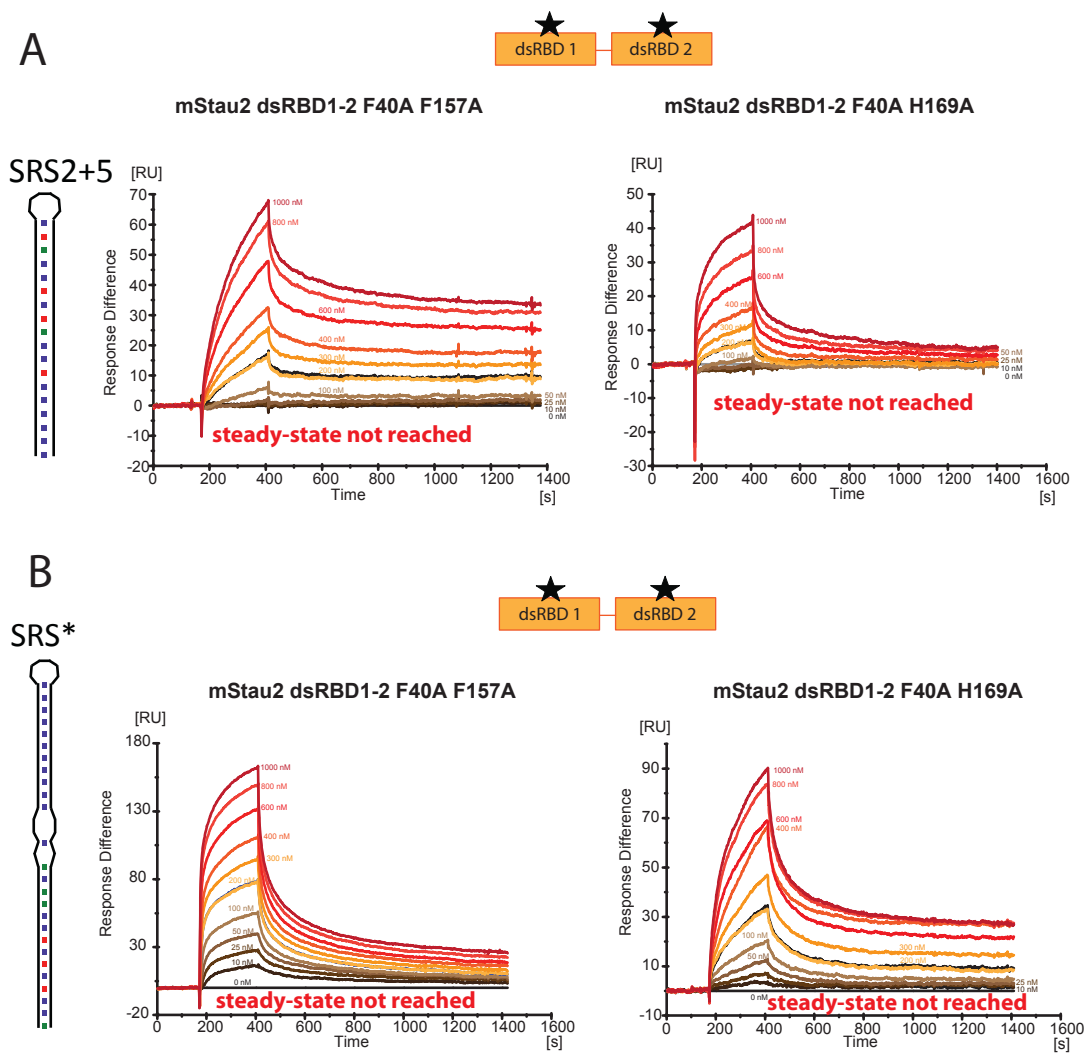

**Figure S14: SPR sensorgrams and plots of maximum response against protein concentration of mStau2 dsRBD1-2 double-mutants binding to SRS RNA. Binding to A) SRS2+5 and B) SRS\* is strongly decreased as compared to wild-type mStau2 dsRBD1-2.**

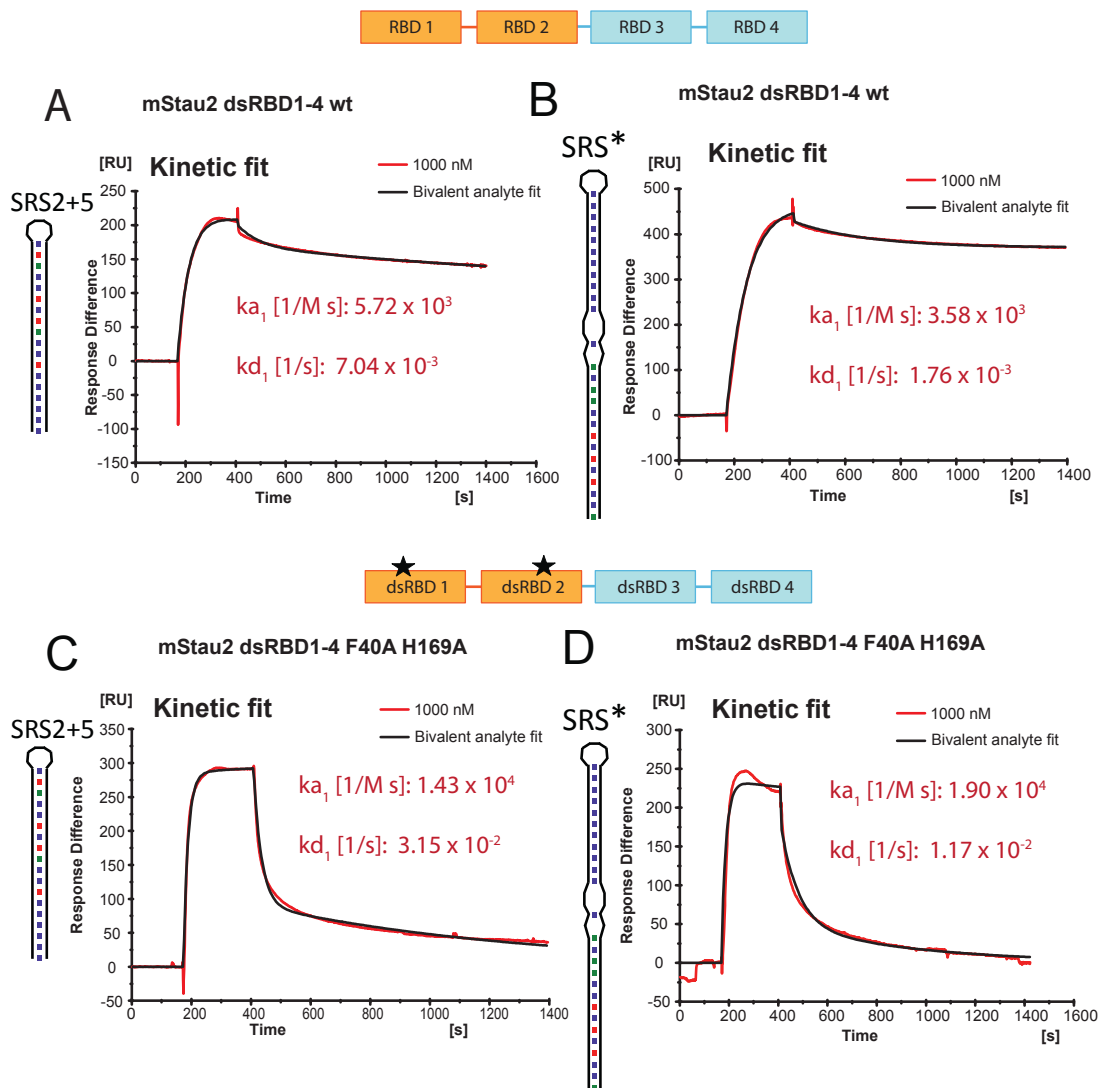

**Figure S15: SPR results for mStau2 RBD1-4 and double-mutants binding to RNA.** Exemplary kinetic fits (bivalent analyte fit) at 1000 nM protein concentration are shown. **A)** Wild-type mStau2 RBD1-4 binding to SRS2+5 RNA. **B)** mStau2 RBD1-4 F40A H169A binding to SRS2+5. The kinetic fit shows that both  $k_{a1}$  and  $k_{d1}$  are ~10-fold increased as compared to wild-type, indicating a transient binding..**C)** Wild-type mStau2 RBD1-4 binding to SRS\* RNA. **D)** mStau2 RBD1-4 F40A H169A binding to SRS\*. The kinetic fit shows that both  $k_{a1}$  and  $k_{d1}$  are ~5 and ~10-fold increased, respectively, as compared to wild-type.

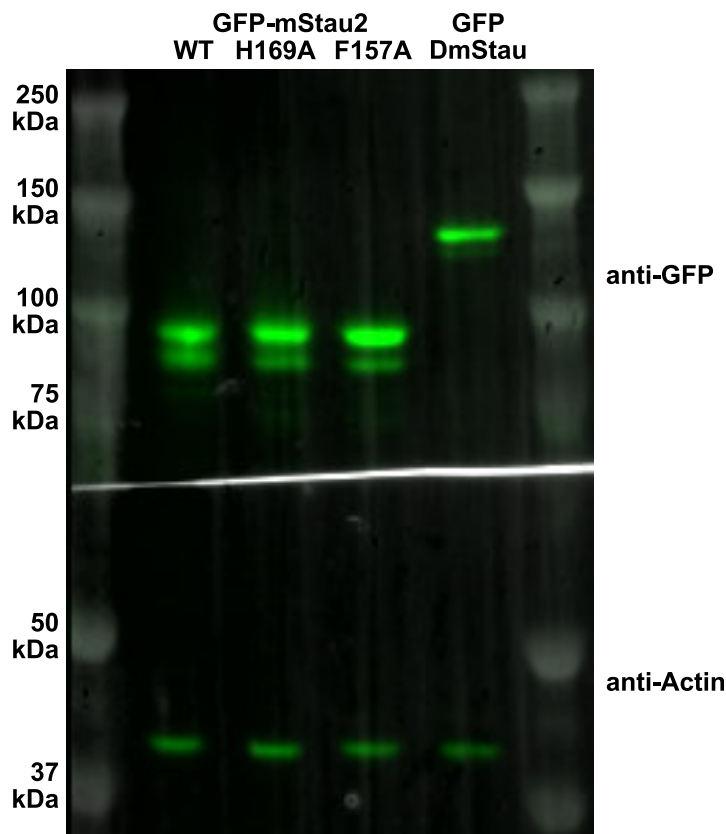

**Figure S16: wt and mutant Stau proteins are equally expressed in the germline of *stau<sup>R9</sup>/stau<sup>D3</sup>* mutant flies.** Expression levels were checked by Western blot. The blot was developed with anti-GFP (Torrey Pines lab, #TP401) and anti-Actin (Sigma A-2066) primary antibodies and HRP conjugated anti-rabbit secondary antibodies (JacksonImmunoResearch).

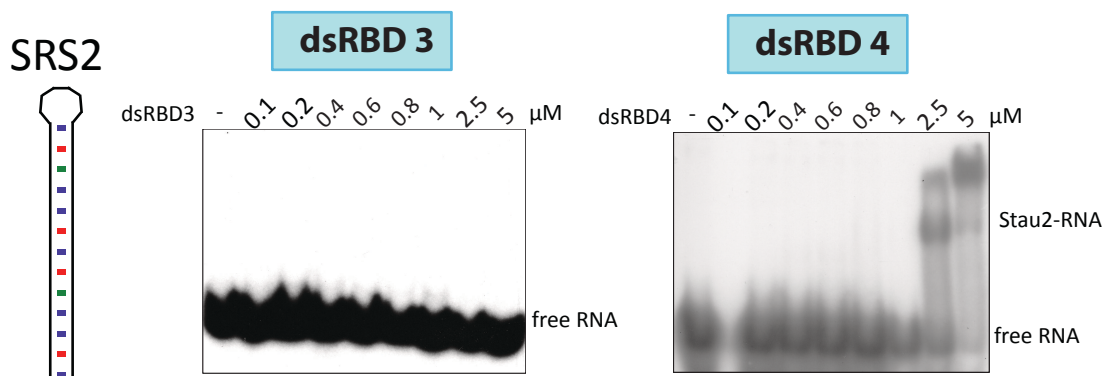

**Figure S17: EMSAs with the individual domains dsRBD3 and 4 and SRS2 RNA.** While dsRBD4 binds SRS2 RNA at micromolar concentrations, no binding can be observed for dsRBD3 up to 5  $\mu$ M protein concentration.



**Table S 1: Data collection and refinement statistics**

| <b>SRS2 RNA</b>                           |                          |
|-------------------------------------------|--------------------------|
| <b>Data collection</b>                    |                          |
| Space group                               | C 1 2 1                  |
| <b>Cell dimensions</b>                    |                          |
| a, b, c (Å)                               | 114.020 32.390 46.370    |
| $\alpha, \beta, \gamma$ (°)               | 90.00 103.47 90.00       |
| Resolution (Å)                            | 55.44 - 1.73             |
| I/ $\sigma$ (I)                           | 17.92 (1.88)             |
| CC <sub>1/2</sub>                         | 99.9 (75.7)              |
| Completeness (%)<br>(in resolution range) | 96.8<br>(39.82 - 1.73)   |
| Redundancy                                | 5.1 (5.4)                |
| <b>Refinement</b>                         |                          |
| Resolution (Å)                            | 39.82 - 1.73             |
| No. of reflections                        | 16965                    |
| R <sub>work</sub> /R <sub>free</sub>      | 18.5/23.7                |
| R <sub>free</sub> test set                | 819 reflections (4.83 %) |
| <b>No. of atoms</b>                       |                          |
| RNA                                       | 1421                     |
| Ba ion                                    | 1290                     |
| Mg ion                                    | 13                       |
| Water                                     | 1                        |
| Wilson B factor (Å <sup>2</sup> )         | 116                      |
| Average B, all atoms (Å <sup>2</sup> )    | 30.6                     |
| Anisotropy                                | 45.0                     |
| Fo,Fc correlation                         | 0.048                    |
| R.m.s. deviations                         | 0.97                     |
| Bond lengths (Å)                          | 0.007                    |
| Bond angles (°)                           | 0.910                    |

**Table S2: Plasmids**

| Short name                                 | Full name/description                               | Source/Cloning strategy           |
|--------------------------------------------|-----------------------------------------------------|-----------------------------------|
| pRgs4                                      | pExpress1<br>- Rgs4 ( (B) ...<br>IMAGp998E0615376Q) | Kiebler lab (LMU München)         |
| pRgs4 3'UTR<br>$\Delta$ SRS2               | pEGFP-C2-Rgs4 3'UTR SRS2<br>deletion 3'UTR          | Kiebler lab (LMU München)         |
| pRgs4 3'UTR<br>$\Delta$ SRS1               | pEGFP-C2-Rgs4 3'UTR SRS1<br>deletion                | Kiebler lab (LMU München)         |
| pRgs4 3'UTR<br>$\Delta$ SRS1 $\Delta$ SRS2 | pEGFP-C2-Rgs4 3'UTR SRS1<br>and SRS2 deletion 3'UTR | Kiebler lab (LMU München)         |
| pET-<br>dmStaufen                          | pET3a-Staufen cDNAE10                               | Ephrussi lab (EMBL<br>Heidelberg) |

| <b>Short name</b>                     | <b>Full name/description</b>                                                                                               | <b>Source/Cloning strategy</b>                                                                                      |
|---------------------------------------|----------------------------------------------------------------------------------------------------------------------------|---------------------------------------------------------------------------------------------------------------------|
| prsEGFP2                              |                                                                                                                            | Ephrussi lab (EMBL Heidelberg)                                                                                      |
| <b>Plasmids created in this study</b> |                                                                                                                            |                                                                                                                     |
| SH17                                  | pCR-II-Blunt-TOPO-Rgs4 BR                                                                                                  | Blunt end TOPO cloning                                                                                              |
| SH22                                  | pOPINS3C-mStau2 FL<br>(Staufen homolog 2 isoform 3 [Mus Musculus],<br>NCBI Reference Sequence:<br>NP_079579.2)             | InFusion cloning,<br>primers Stau2 FW and Stau2 RV                                                                  |
| SH23                                  | pOPINS3C-mStau2 RBD3-4<br>(mStau2 200-373)                                                                                 | InFusion cloning,<br>primers RBD3 FW and RBD4 RV                                                                    |
| SH27                                  | pOPINS3C-Stau2 RBD4<br>(mStau2 272-373)                                                                                    | InFusion cloning,<br>primers RBD4 FW and RBD4 RV                                                                    |
| SH29                                  | pOPINS3C-mStau2 RBD1-4<br>(mStau2 1-373)                                                                                   | InFusion cloning,<br>primers Stau2 FW and RBD4 RV                                                                   |
| SH30                                  | pFastBacDual-HisSUMO-mStau2 FL<br>(Staufen homolog 2 isoform 3 [Mus Musculus],<br>NCBI Reference Sequence:<br>NP_079579.2) | InFusion cloning, primers His-SUMO FW and mStau2 RV-pFBD                                                            |
| SH31                                  | pOPINS3C-mStau2 RBD1-2<br>(mStau2 1-208)                                                                                   | InFusion cloning,<br>primers Stau2 FW and RBD2 RV                                                                   |
| SH41                                  | pOPINS3C-mStau2 RBD1-2 E15A<br>(mStau2 1-208 E15A)                                                                         | InFusion cloning,<br>3-point PCR with primers Stau2 FW+Stau2 E15A antisense, Stau2 E15A sense+RBD2 RV               |
| SH42                                  | pOPINS3C-mStau2 RBD1-2 K59A K60A<br>(mStau2 1-208 K59A K60A)                                                               | InFusion cloning,<br>3-point PCR with primers Stau2 FW+Stau2 K59A K60A antisense, Stau2 K59A K60A sense+RBD2 RV     |
| SH45                                  | pOPINS3C-mStau2 RBD2<br>(mStau2 94-208)                                                                                    | InFusion cloning,<br>primers RBD2 SM FW and RBD2 RV                                                                 |
| SH46                                  | pOPINJ-mStau2 RBD1-6xHis<br>(mStau2 (1-74) - 6xHis)                                                                        | InFusion cloning,<br>PCR1 with Stau2 FW and RBD1+6xHis RV, PCR2 on product of PCR1 with Stau2 FW and pOPIN-6xHis RV |
| SH47                                  | pOPINS3C-mStau2 RBD1 linker<br>(mStau2 1-93)                                                                               | InFusion cloning,<br>primers Stau2 FW and RBD1-linker RV                                                            |

| <b>Short name</b> | <b>Full name/description</b>                            | <b>Source/Cloning strategy</b>                                                                                                                             |
|-------------------|---------------------------------------------------------|------------------------------------------------------------------------------------------------------------------------------------------------------------|
| SH48              | pOPINS3C-mStau2 linker-RBD2<br>(mStau2 75-208)          | InFusion cloning,<br>primers linker-RBD2 FW and<br>RBD2 RV                                                                                                 |
| SH49              | pOPINS3C-mStau2 RBD1-2<br>H36A<br>(mStau2 1-208 H36A)   | InFusion cloning,<br>3-point PCR with primers<br>Stau2 FW+Stau2 H36A<br>antisense, Stau2 H36A<br>sense+RBD2 RV                                             |
| SH50              | pOPINS3C-mStau2 RBD1-2<br>F40A<br>(mStau2 1-208 F40A)   | InFusion cloning,<br>3-point PCR with primers<br>Stau2 FW+Stau2 F40A<br>antisense, Stau2 F40A<br>sense+RBD2 RV                                             |
| SH51              | pOPINS3C-mStau2 RBD1-2<br>K59A<br>(mStau2 1-208 K59A)   | InFusion cloning,<br>3-point PCR with primers<br>Stau2 FW+Stau2 K59A<br>antisense, Stau2 K59A<br>sense+RBD2 RV                                             |
| SH52              | pOPINS3C-mStau2 RBD1-2<br>K60A<br>(mStau2 1-208 K60A)   | InFusion cloning,<br>3-point PCR with primers<br>Stau2 FW+Stau2 K60A<br>antisense, Stau2 K60A<br>sense+RBD2 RV                                             |
| SH53              | pBlueScript-KS-rsEGFP2-<br>mStau2 FL                    | InFusion cloning, restriction<br>enzymes BamHI and XbaI,<br>3-point PCR with primers<br>pBSKS-rsEGFP2 FW +<br>rsEGFP+3C RV, 3C+Stau2 FW+<br>pBSKS-Stau2 RV |
| SH55              | pOPINS3C-mStau2 RBD1-2<br>E99A<br>(mStau2 1-208 E99A)   | InFusion cloning,<br>3-point PCR with primers<br>Stau2 FW+Stau2 E99A<br>antisense, Stau2 E99A<br>sense+RBD2 RV                                             |
| SH56              | pOPINS3C-mStau2 RBD1-2<br>F157A<br>(mStau2 1-208 F157A) | InFusion cloning,<br>3-point PCR with primers<br>Stau2 FW+Stau2 F1570A<br>antisense, Stau2 F157A<br>sense+RBD2 RV                                          |
| SH58              | pOPINS3C-mStau2 RBD1-2<br>H169A<br>(mStau2 1-208 H169A) | InFusion cloning,<br>3-point PCR with primers<br>Stau2 FW+Stau2 H169A<br>antisense, Stau2 H169A<br>sense+RBD2 RV                                           |
| SH59              | pUASp attb-rsEGFP2-mStau2                               | Infusion cloning with primers<br>pUASp-rsEGFP2 FW and<br>pUASp-Stau2 RV, template<br>SH53                                                                  |

| <b>Short name</b> | <b>Full name/description</b>                                | <b>Source/Cloning strategy</b>                                                                                         |
|-------------------|-------------------------------------------------------------|------------------------------------------------------------------------------------------------------------------------|
| SH60              | pOPINS3C-mStau2 RBD1-2 K106A (mStau2 1-208 K106A)           | InFusion cloning, 3-point PCR with primers Stau2 FW+Stau2 K106A antisense, Stau2 K106A sense+RBD2 RV                   |
| SH64              | pOPINS3C-mStau2 RBD1-2 F40A H169A (mStau2 1-208 F40A H169A) | InFusion cloning, 3-point PCR with primers Stau2 FW+Stau2 F40A antisense, Stau2 F40A sense+RBD2 RV on SH58 as template |
| SH65              | pOPINS3C-mStau2 RBD1-2 F40A H169A (mStau2 1-208 F40A F157A) | InFusion cloning, 3-point PCR with primers Stau2 FW+Stau2 F40A antisense, Stau2 F40A sense+RBD2 RV on SH56 as template |
| SH66              | pBlueScript-KS-rsEGFP2-mStau2 F40A                          | Site-directed mutagenesis (QuikChange II kit) with Stau2 F40A sense and Stau2 F40A antisense                           |
| SH67              | pBlueScript-KS-rsEGFP2-mStau2 F40A F157A                    | Site-directed mutagenesis (QuikChange II kit) on SH66 with Stau2 F157A sense and Stau2 F157A antisense                 |
| SH68              | pBlueScript-KS-rsEGFP2-mStau2 F40A H169A                    | Site-directed mutagenesis (QuikChange II kit) on SH66 with Stau2 H169A sense and Stau2 H169A antisense                 |
| SH69              | pOPINS3C-mStau2 RBD1-4 F40A H169A                           | InFusion cloning with primers Stau2 FW and RBD4 RV on template SH68                                                    |
| SH70              | pOPINS3C-mStau2 RBD1-4 F40A F157A                           | InFusion cloning with primers Stau2 FW and RBD4 RV on template SH67                                                    |
| SH71              | pUASp attB-rsEGFP2-mStau2 F40A F157A                        | Infusion cloning with primers pUASp-rsEGFP2 FW and pUASp-Stau2 RV, template SH67                                       |
| SH72              | pUASp attB-rsEGFP2-mStau2 F40A H169A                        | Infusion cloning with primers pUASp-rsEGFP2 FW and pUASp-Stau2 RV, template SH68                                       |

**Table S3: Cloning primers**

| <b>Primer name</b>   | <b>Primer description</b>             | <b>Sequence 5'→3'</b>                               |
|----------------------|---------------------------------------|-----------------------------------------------------|
| mStau2 FW            | pOPIN- mStau2 FW<br>+PPsite           | AAGTTCTGTTTCAGGGCCCGATGG<br>CAAACCCCAAAGAGA         |
| RBD2 FW              | pOPIN- mStau2 RBD2 FW<br>+PPsite      | AAGTTCTGTTTCAGGGCCCGATGC<br>CCAAGATCTTTTATGTTCAGT   |
| Linker-RBD2<br>FW    | pOPIN- mStau2 RBD2 long<br>FW +PPsite | AAGTTCTGTTTCAGGGCCCGCTTC<br>CAAACCCAGTTCAGAAAC      |
| RBD3 FW              | pOPIN- mStau2 RBD3 FW<br>+PPsite      | AAGTTCTGTTTCAGGGCCCGATAA<br>GCTTAGTGTTTGAGATTGCGC   |
| RBD1-linker<br>RV    | mStau2 RBD1-linker RV-<br>pOPIN       | CTGGTCTAGAAAGCTTCTCTAACT<br>ACCTGGGTATTATTGACATTAC  |
| RBD2 RV              | mStau2 RBD2 RV-pOPIN                  | CTGGTCTAGAAAGCTTCTATTTCAG<br>ATTTATTTGCATCTTTATCGTC |
| RBD4 RV              | mStau2 RBD4 RV-pOPIN                  | CTGGTCTAGAAAGCTTCTAAAGCT<br>GTAACAGCATTGCTT         |
| Stau2 RV             | mStau2 FL RV-pOPIN                    | CTGGTCTAGAAAGCTTCTAGATGG<br>CCGACTTTGAT             |
| pOPIN-6xHis<br>RV    | pOPIN-6xHis RV                        | CTGGTCTAGAAAGCTTCTAgtgatgg<br>tggtgatggtg           |
| RBD1-6xHis<br>RV     | RBD1-6xHis RV                         | gtgatggtggtgatggtgCGTAGATTTCGT<br>CAAACGCTT         |
| His-SUMO FW          | pFastBacDual-His-SUMO<br>FW           | CATCGGGCGCGGATCCATGGCACA<br>CCATCACCAC              |
| Stau2 FL RV-<br>pFBD | Stau2 FL RV-pFastBacDual              | ACTTCTCGACAAGCTTCTAGATGG<br>CCGACTTTGAT             |
| pBSKS-<br>rsEGFP2 FW | pBSKS-rsEGFP2 FW                      | gcggtggcggccgctctaagaatggtgagcaag<br>ggcga          |
| rsEGFP+3C RV         | rsEGFP+3C RV                          | cgggccctgaaacagaacttccagcttgata<br>gctcgtccatgc     |
| 3C+mStau2 FW         | 3C+mStau2 FW                          | ctggaagtctgtttcagggcccgATGGCA<br>AACCCCAAAGAGAA     |
| pBSKS-mStau2<br>RV   | pBSKS-mStau2 RV                       | tcctgcagcccgggggatccCTAGATGGC<br>CGACTTTGATTTCT     |
| pUASp-<br>rsEGFP2 FW | pUASp-rsEGFP2 FW                      | AGGCCACTAGTGATCTGGATCCat<br>ggtgagcaagggcga         |
| pUASp-mStau2<br>RV   | pUASp-mStau2 RV                       | TTAACGTTTCGAGGTCGACTCTAGA<br>CTAGATGGCCGACTTTGATT   |

**Table S4: Mutagenesis primers**

| <b>Primer name</b>         | <b>Primer description</b>         | <b>Sequence 5'→ 3'</b>                                |
|----------------------------|-----------------------------------|-------------------------------------------------------|
| mStau2 E15A antisense      | a44c_antisense                    | ggaaacgggctaacgcattaccagacacactgga<br>g               |
| Stau2 E15A sense           | a44c                              | ctccagtgtgtctggtaaagcgtagccggttc                      |
| mStau2 H36A antisense      | c106g_a107c_antisense             | caccgaaaacatcttgaagcagcaggcccgttc<br>attc             |
| mStau2 H36A sense          | c106g_a107c_                      | gaatgaaagcgggctgctgcttgaagatgtttc<br>gtg              |
| mStau2 F40A antisense      | t118g_t119c_antisense             | agactcagctgcaccgaagccatcttgaatgagca<br>gg             |
| mStau2 F40A sense          | t118g_t119c                       | cctgctcattcgaagatggcttcggtgcagctgagtc<br>t            |
| mStau2 K59A antisense      | a175g_a176c_antisense             | ttgttggccttcgctatactgctcccttcggattccc                 |
| Stau2 K59A sense           | a175g_a176c                       | gggaatccgaaggagcagtatagcgaaggcccaa<br>caa             |
| mStau2 K60A antisense      | a178g_a179c_antisense             | caacagcttggggccgcttatactgctcccttcg<br>g               |
| Stau2 K60A sense           | a178g_a179c_                      | ccgaaggagcagtataaaggcggccaacaagct<br>gttg             |
| mStau2 K59A K60A antisense | a175g_a176c_a178g_a179c_antisense | cagcttggggccgctatactgctcccttcggat<br>tccatgt          |
| mStau2 K59A K60A sense     | a175g_a176c_a178g_a179c           | acatgggaatccgaaggagcagtatagcggcggc<br>ccaacaagctg     |
| mStau2 Δ119-135 antisense  |                                   | ggcaatgatacctctgtggatctagtggcctg                      |
| mStau2 Δ119-135 sense      |                                   | caggccactagatccacagaggtatcattgcc                      |
| mStau2 E99A antisense      | a296c_antisense                   | tagcgagcccattcagtgccacagttggagtata                    |
| Stau2 E99A sense           | a296c_sense                       | tataactccaactgtggcactgaatgggctcgcta                   |
| mStau2 K106A antisense     | a316g_a317c_antisense             | ggcaggctctccccttgccatagcgagcccattc                    |
| mStau2 K106A sense         | a316g_a317c                       | gaatgggctcgctatggcaaggggagagcctgcc                    |
| mStau2 F157A sense         | t469g_t470c                       | gttcagttaactgtaggaaataatgaagcctttggtg<br>aagggaagactc |
| mStau2 F157A antisense     | t469g_t470c_antisense             | gagtcttccttcaccaaaggcttcattatttctaca<br>gttaactgaac   |
| mStau2 H169A antisense     | c505g_a506c_antisense             | ctttcatcgcagcattggctctggcagcttgcgag                   |
| mStau2 H169A sense         | c505g_a506c                       | ctcgacaagctgccagagccaatgctgcgatgaaa<br>g              |

**Table S5: Template primers for RNA *in vitro* transcription**

| <b>Primer name</b>   | <b>Primer description</b>  | <b>Sequence 5'→3'</b>                                                                              |
|----------------------|----------------------------|----------------------------------------------------------------------------------------------------|
| <b>3'UTR FW</b>      | T7prom+Rgs4 3'UTR FW       | AATTTAATACGACTCACTATAGGttctc<br>acacagaggcagagaacc                                                 |
| <b>3'UTR RV</b>      | Rgs4 3'UTR 2129 RV         | aggcctataaagcacatggcagaaacagacat                                                                   |
| <b>BR FW</b>         | T7prom+Rgs4 3'UTR<br>257FW | AATTTAATACGACTCACTATAGGtaat<br>ggcctgtaggtctgg                                                     |
| <b>BR RV</b>         | Rgs4 3'UTR 870 RV          | acgtgagcaaccaaccac                                                                                 |
| <b>T7 FW</b>         | T7prom FW                  | AATTTAATACGACTCACTATAGG                                                                            |
| <b>SRS1 RV</b>       | SRS1-T7prom RV             | GCTCCATCAAGACCCAGTGGCTTGAC<br>GGAACCCTATAGTGAGTCGTATTA<br>AA<br>TT                                 |
| <b>SRS2 RV</b>       | SRS2-T7prom RV             | ACATACACATACACAAATTGCATGTG<br>CATGTCCCTATAGT<br>GAGTCGTATTA<br>AATT                                |
| <b>SRS3 RV</b>       | SRS3-T7prom RV             | Catgtgtgaacatatacaatatatatatgcata<br>tatatatatattcatgcacattcacacataCCTA<br>TAGTGAGTCGTATTA<br>AATT |
| <b>SRS2+5 RV</b>     | SRS2+5-T7prom RV           | TATATACATACACATACACAAATTGC<br>ATGTGCATGTATATACCTATAGTGAG<br>TCGTATTA<br>AATT                       |
| <b>11bpSRS2+5 RV</b> | 11bpSRS2+5- T7prom RV      | TATATACATACACATACAAATCATGT<br>GCATGTCCTATAGTGAGTCGTATTA<br>AA<br>ATT                               |
| <b>9bpSRS2+5 RV</b>  | 9bpSRS2+5-T7prom RV        | TATATACATACACACAAATTGTGCAT<br>GTCCTATAGTGAGTCGTATTA<br>AATT                                        |
| <b>7bpSRS2+5 RV</b>  | 7bpSRS2+5-T7prom RV        | TATATACATACACAAATTGCATGTCCT<br>ATAGTGAGTCGTATTA<br>AATT                                            |
| <b>6bpSRS2+5 RV</b>  | 6bpSRS2+5-T7prom RV        | TATATACATACCAAAATGCATGTCCTAT<br>AGTGAGTCGTATTA<br>AATT                                             |

**Table S6: RNA sequences**

| <b>Short name</b> | <b>Full name/<br/>description<br/>(numbering relative to start of<br/>3'UTR)</b>                                                         | <b>Production</b>                                                                   |
|-------------------|------------------------------------------------------------------------------------------------------------------------------------------|-------------------------------------------------------------------------------------|
| <i>Rgs4</i> 3'UTR | <i>Rgs4</i> 3'UTR FL<br><br>Rattus norvegicus regulator of<br>G-protein signaling 4 ( <i>Rgs4</i> ),<br>mRNA<br>NCBI Reference Sequence: | <i>In vitro</i> transcription<br>(Ambion MegaScript),<br>primer: 3'UTR FW, 3'UTR RV |

| Short name           | Full name/<br>description<br>(numbering relative to start of<br>3'UTR) | Production                                                                                            |
|----------------------|------------------------------------------------------------------------|-------------------------------------------------------------------------------------------------------|
|                      | NM_017214.1<br>(3'UTR: nt 728-2919 of mRNA)                            |                                                                                                       |
| BR                   | <i>Rgs4</i> 3'UTR (257-890)                                            | <i>In vitro</i> transcription<br>(Ambion MegaScript),<br>primer: BR FW, BR RV                         |
| BR<br>ΔSRS2          | <i>Rgs4</i> 3'UTR (257-890) Δ(354-366)(417-429)                        | <i>In vitro</i> transcription<br>(Ambion MegaScript),<br>primer: BR FW, BR RV                         |
| BR ΔSRS1             | <i>Rgs4</i> 3'UTR (257-890)Δ(729-759)                                  | <i>In vitro</i> transcription<br>(Ambion MegaScript),<br>primer: BR FW, BR RV                         |
| BR<br>ΔSRS1<br>ΔSRS2 | <i>Rgs4</i> 3'UTR (257-890)Δ(354-366)(417-429) (729-759)               | <i>In vitro</i> transcription<br>(Ambion MegaScript),<br>primer: BR FW, BR RV                         |
| SRS1                 | <i>Rgs4</i> 3'UTR (729-759)                                            | <i>In vitro</i> transcription (Ambion<br>MegaShortScript),<br>Chemical synthesis (IBA)                |
| SRS2                 | <i>Rgs4</i> 3'UTR (354-429)-Δ(367-416)AUUUG                            | <i>In vitro</i> transcription (Ambion<br>MegaShortScript),<br>Chemical synthesis<br>(Dharmacon & IBA) |
| SRS3                 | <i>Rgs4</i> 3'UTR (492-555)                                            | <i>In vitro</i> transcription (Ambion<br>MegaShortScript)                                             |
| SRS2+5               | <i>Rgs4</i> 3'UTR (349-434)-Δ(367-416)AUUUG                            | <i>In vitro</i> transcription, primers:<br>T7prom, dsSRS2+5 RV                                        |
| 11bpSRS2+5           | <i>Rgs4</i> 3'UTR (354-434)-Δ(369-418)AUUUG                            | <i>In vitro</i> transcription (Ambion<br>MegaShortScript),<br>primers: T7prom,<br>11bpSRS2+5 RV       |
| 9bpSRS2+5            | <i>Rgs4</i> 3'UTR (354-434)-Δ(371-419)AUUUG                            | <i>In vitro</i> transcription (Ambion<br>MegaShortScript),<br>primers: T7prom, 9bpSRS2+5<br>RV        |
| 7bpSRS2+5            | <i>Rgs4</i> 3'UTR (354-434)-Δ(373-421)AUUUG                            | <i>In vitro</i> transcription (Ambion<br>MegaShortScript),<br>primers: T7prom, 7bpSRS2+5<br>RV        |
| 6bpSRS2+5            | <i>Rgs4</i> 3'UTR (354-434)-Δ(374-422)AUUUG                            | <i>In vitro</i> transcription (Ambion<br>MegaShortScript),<br>primers: T7prom, 6bpSRS2+5<br>RV        |



**Table S7. Sequences of ssDNA oligonucleotides specific to *bicoid***

| <b>Name</b>        | <b>Sequence</b>        |
|--------------------|------------------------|
| <b>bcd_5UTR_1</b>  | TGGCAAAGGAGTGTGGAAAC   |
| <b>bcd_CD_1</b>    | CTGAAGCTGCGGATGTTGG    |
| <b>bcd_CD_2</b>    | TCGAAGGGATTCGGAATTG    |
| <b>bcd_CD_3</b>    | CCATATCTTCACCTGGGCTG   |
| <b>bcd_CD_4</b>    | GTCCTTGTGCTGATCCGAT    |
| <b>bcd_CD_5</b>    | CTCCACCCAAGCTAAGAGTC   |
| <b>bcd_CD_6</b>    | GCGTTGAATGACTCGCTGTAG  |
| <b>bcd_CD_7</b>    | TGTGGCCTCCATTGTAGTTG   |
| <b>bcd_CD_8</b>    | GGTGATTATGGACCTGCTGC   |
| <b>bcd_CD_9</b>    | GCTGGAAGTCAAAGTGATGG   |
| <b>bcd_CD_10</b>   | GTAGTACGAGCTGTTGAAGTTG |
| <b>bcd_CD_11</b>   | GTGTTAATGGCTCGTAGACC   |
| <b>bcd_CD_12</b>   | CACACAGACTCGGACTTTCG   |
| <b>bcd_CD_13</b>   | CTTCTTGCTCGTTCCGTCG    |
| <b>bcd_CD_14</b>   | CCCTTCAAAGGCTCCAAGATC  |
| <b>bcd_CD_15</b>   | CTAAGGCTCTTATTCCGGTGC  |
| <b>bcd_CD_16</b>   | CTCCACGATTTCCGGTTCC    |
| <b>bcd_CD_17</b>   | GCTTGCATTATCGTATCCATCG |
| <b>bcd_CD_18</b>   | CATCCAGGCTAATTGAAGCAG  |
| <b>bcd_3'UTR_1</b> | ATGAAACTCTCTAACACGCCTC |
| <b>bcd_3'UTR_2</b> | GTACAATCAGGAACAACAGTGG |
| <b>bcd_3'UTR_3</b> | ACACGGATCTTAGGACTAGACC |
| <b>bcd_3'UTR_4</b> | GAATAGCGTATTGCAGGGAAAG |
| <b>bcd_3'UTR_5</b> | GCCCAAATGGCCTCAAATG    |
| <b>bcd_3'UTR_6</b> | CCGAAATGTGGGACGATAAC   |

### **References**

Ramos, A., Grunert, S., Adams, J., Micklem, D.R., Proctor, M.R., Freund, S., Bycroft, M., St Johnston, D., and Varani, G. (2000). RNA recognition by a Staufen double-stranded RNA-binding domain. *EMBO J* 19, 997-1009.
